# Supplementary material
Source: PubMed Central journal article supplement (PMC6581614)

Fig. S5

A

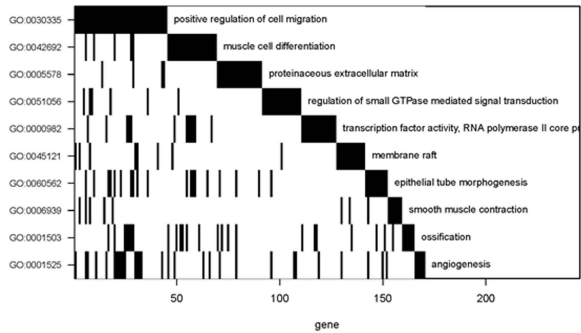

B

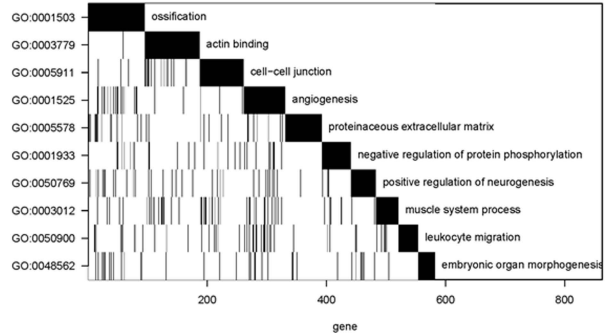

C

NICD effect in resistant and not in sensitive

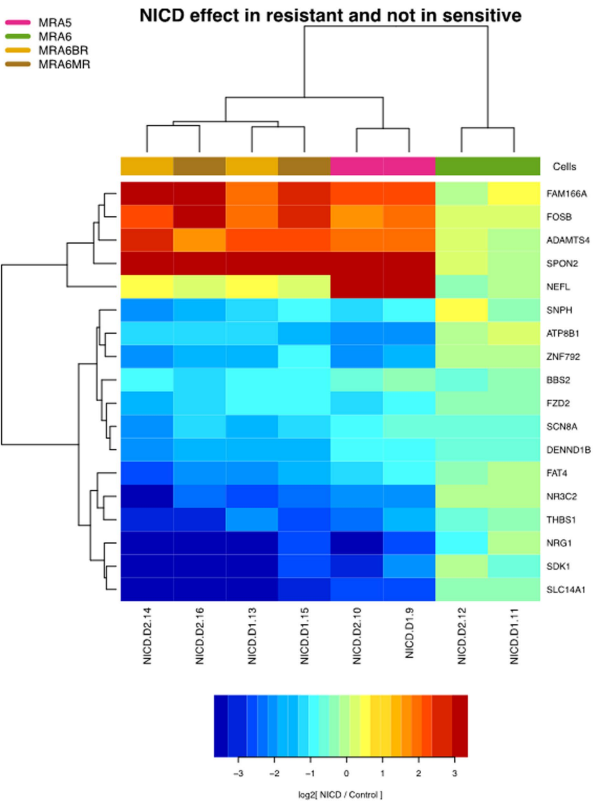

D

NICD effect in sensitive and not in resistant

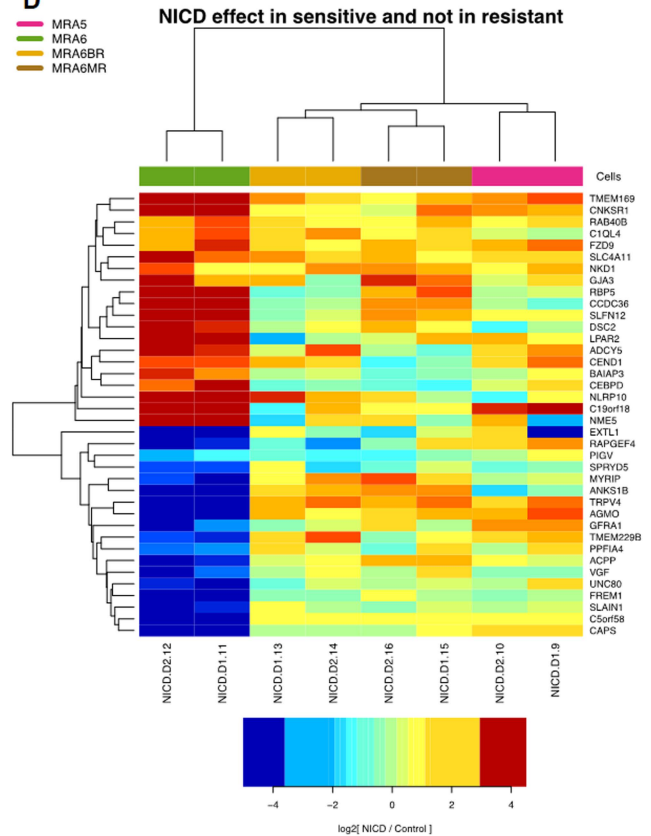

Supplement: NIHMS1005263-supplement-Supp_FigS5.pdf [file NIHMS1005263-supplement-Supp_FigS5.pdf]
