# Supplementary material
Source: PubMed Central journal article supplement (PMC6581614)

Fig. S6

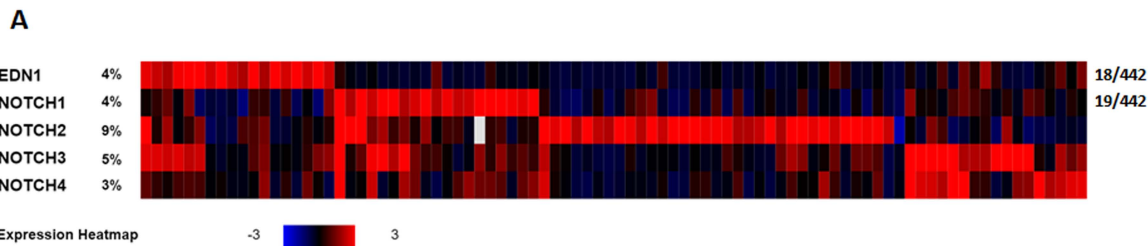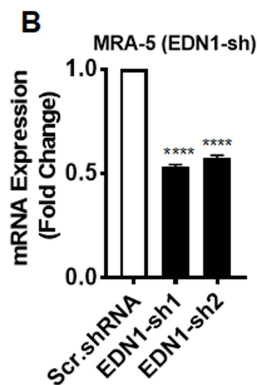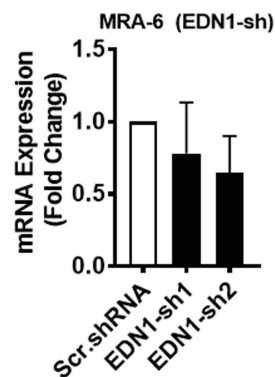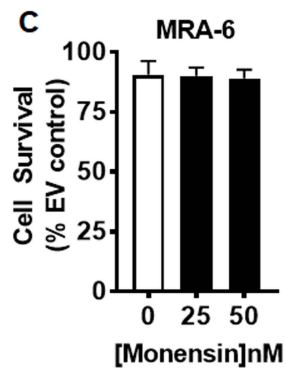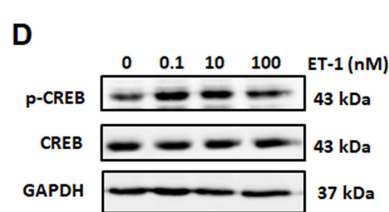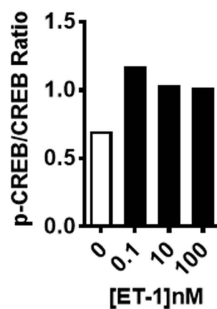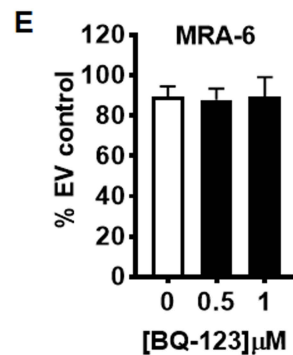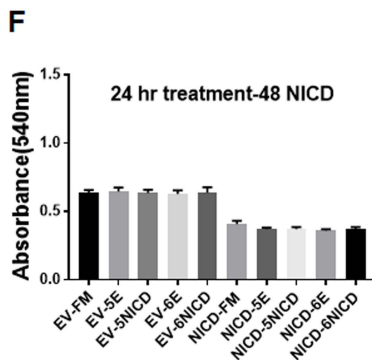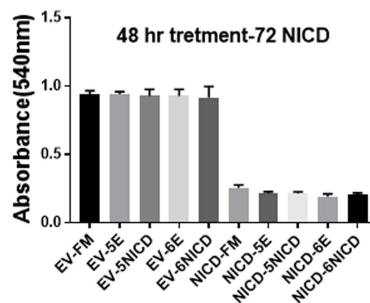

Supplement: NIHMS1005263-supplement-Supp_FigS6.pdf [file NIHMS1005263-supplement-Supp_FigS6.pdf]

Fig. S1

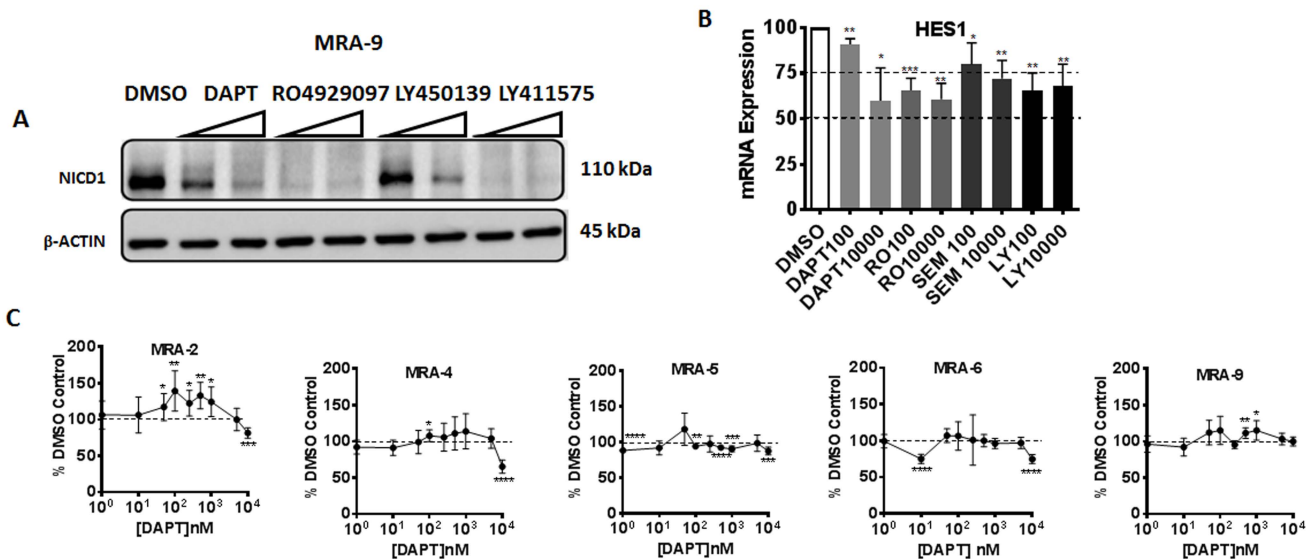

Supplement: NIHMS1005263-supplement-Supp_figS1.pdf [file NIHMS1005263-supplement-Supp_figS1.pdf]

Fig. S2

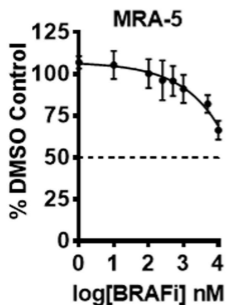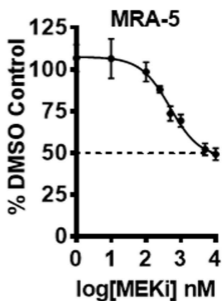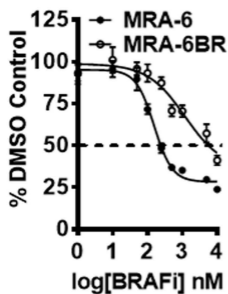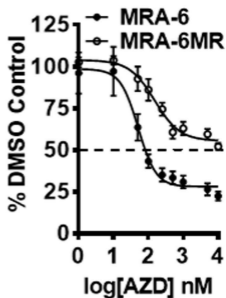

Supplement: NIHMS1005263-supplement-Supp_figS2.pdf [file NIHMS1005263-supplement-Supp_figS2.pdf]

Fig. S3

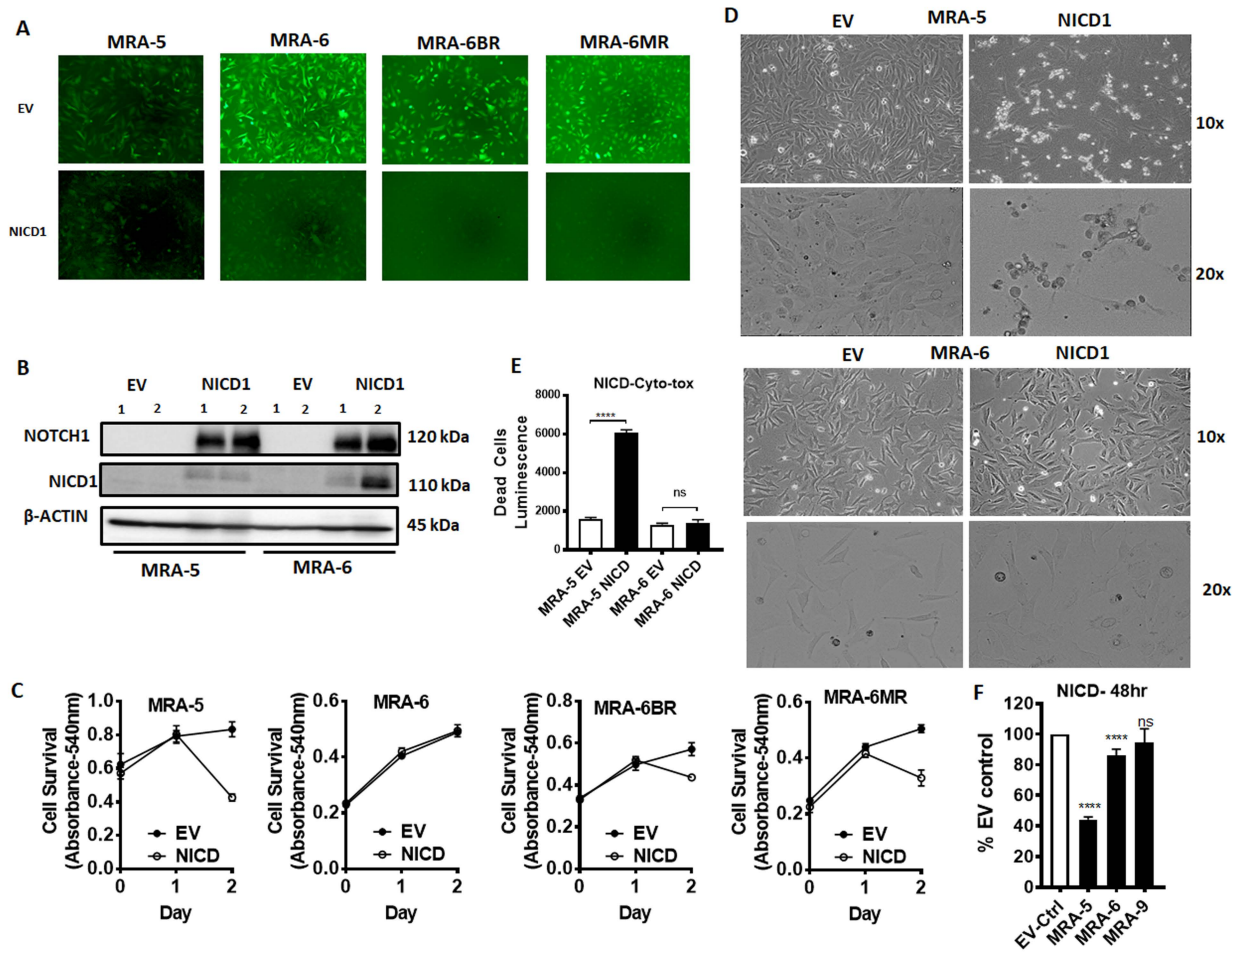

Supplement: NIHMS1005263-supplement-Supp_figS3.pdf [file NIHMS1005263-supplement-Supp_figS3.pdf]

Fig. S4

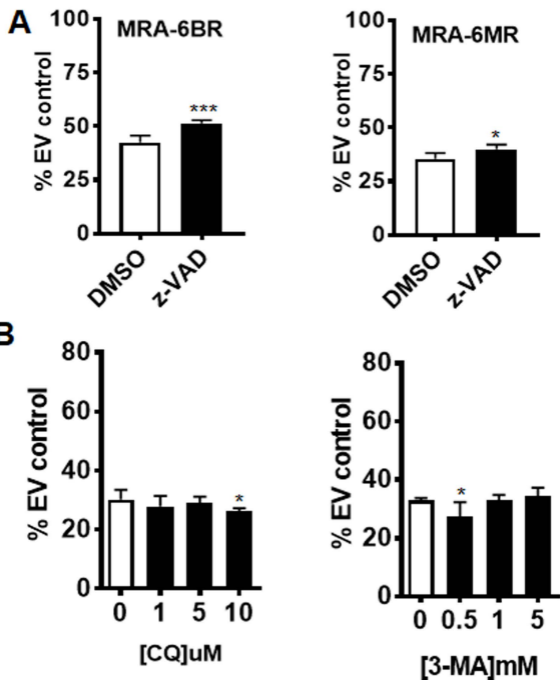

Supplement: NIHMS1005263-supplement-Supp_figS4.pdf [file NIHMS1005263-supplement-Supp_figS4.pdf]
